# Supplementary material for: Hospitalization Trends in Adult Patients with COPD and Other Respiratory Diseases in Northeast China from 2005 to 2015
Source: Hindawi journal article supplement (doi:10.1155/2018/1060497), 2018-01-01
Supplement: f1 [file 1060497.f1.pdf]

Table S1. Number of hospitalizations for patients with COPD, pneumonia, asthma and lung cancer, in Dalian city, from 2005 to 2015.

|             | 2005   | 2006   | 2007   | 2008   | 2009   | 2010   | 2011   | 2012   | 2013   | 2014   | 2015   |
|-------------|--------|--------|--------|--------|--------|--------|--------|--------|--------|--------|--------|
| All         | 351754 | 373436 | 454327 | 490004 | 554416 | 617817 | 677951 | 756058 | 817872 | 919441 | 955713 |
| Gender      |        |        |        |        |        |        |        |        |        |        |        |
| Male        | 177227 | 186110 | 223246 | 241403 | 271405 | 302349 | 329720 | 362408 | 390912 | NA     | NA     |
| Female      | 174527 | 187324 | 231081 | 248599 | 283010 | 315468 | 348231 | 393647 | 416960 | NA     | NA     |
| Age, ≥18 y  | 321478 | 339916 | 417778 | 451719 | 515296 | 571872 | 631078 | 706074 | 757044 | 846431 | 885771 |
| Gender      |        |        |        |        |        |        |        |        |        |        |        |
| Male ≥18y   | 158868 | 165832 | 201360 | 218024 | 247623 | 274703 | 301443 | 332372 | 360100 | NA     | NA     |
| Female ≥18y | 162610 | 174084 | 216418 | 233695 | 267673 | 297169 | 329635 | 373702 | 396944 | NA     | NA     |
| COPD        |        |        |        |        |        |        |        |        |        |        |        |
| Age ≥18y    | 7642   | 7021   | 9359   | 10062  | 11663  | 14509  | 15006  | 18106  | 19224  | 18653  | 20965  |
| Male ≥18y   | 4483   | 4079   | 5251   | 5521   | 6404   | 7997   | 8198   | 9961   | 10675  | NA     | NA     |
| Female ≥18y | 3159   | 2942   | 4108   | 4541   | 5259   | 6512   | 6808   | 8145   | 8549   | NA     | NA     |
| Pneumonia   |        |        |        |        |        |        |        |        |        |        |        |
| Age ≥18y    | 5767   | 5374   | 6297   | 7766   | 9555   | 10948  | 10976  | 12200  | 14435  | 14963  | 15757  |
| Male ≥18y   | 3352   | 3096   | 3796   | 4429   | 5438   | 6057   | 6088   | 6591   | 7651   | NA     | NA     |
| Female ≥18y | 2415   | 2278   | 2501   | 3337   | 4117   | 4891   | 4888   | 5609   | 6784   | NA     | NA     |
| Asthma      |        |        |        |        |        |        |        |        |        |        |        |
| Age ≥18y    | 1115   | 1158   | 1471   | 1597   | 1707   | 1829   | 2065   | 2207   | 2283   | 2620   | 2640   |
| Male ≥18y   | 498    | 470    | 605    | 677    | 720    | 735    | 859    | 912    | 894    | NA     | NA     |
| Female ≥18y | 617    | 688    | 866    | 919    | 987    | 1094   | 1206   | 1295   | 1389   | NA     | NA     |
| Lung Cancer |        |        |        |        |        |        |        |        |        |        |        |
| Age ≥18y    | 3500   | 4277   | 3936   | 4020   | 4326   | 4473   | 4679   | 5024   | 5462   | 6503   | 6709   |
| Male ≥18y   | 2336   | 2773   | 2569   | 2537   | 2719   | 2820   | 2947   | 3021   | 3282   | NA     | NA     |
| Female ≥18y | 1164   | 1504   | 1367   | 1483   | 1607   | 1653   | 1732   | 2003   | 2180   | NA     | NA     |

Table S2. Age-adjusted and age-specified discharge rate, mean length of stay, mean charge per stay and readmission rate for patients with COPD aged  $\geq 18$  years, in Dalian city, from 2005 to 2015.

| Year                              | 2005  | 2006  | 2007  | 2008  | 2009  | 2010  | 2011  | 2012   | 2013   | 2014  | 2015   | P Trend |
|-----------------------------------|-------|-------|-------|-------|-------|-------|-------|--------|--------|-------|--------|---------|
| <b>Rate per 100,000</b>           |       |       |       |       |       |       |       |        |        |       |        |         |
| All Discharges <sup>#</sup>       | 149.0 | 133.0 | 172.5 | 179.3 | 203.9 | 226.9 | 226.0 | 258.3  | 263.1  | 245.4 | 264.7  | <0.001  |
| <b>Age Group, year</b>            |       |       |       |       |       |       |       |        |        |       |        |         |
| 18–35                             | 8.3   | 7.3   | 9.0   | 9.5   | 11.2  | 12.1  | 13.0  | 15.0   | 15.1   | 14.0  | 14.4   | <0.001  |
| 36–60                             | 55.4  | 48.8  | 65.6  | 73.9  | 95.6  | 108.9 | 122.8 | 132.3  | 137.4  | 133.4 | 137.4  | <0.001  |
| >61                               | 647.1 | 579.6 | 746.1 | 759.5 | 831.6 | 919.0 | 873.8 | 1020.7 | 1033.2 | 949.1 | 1043.0 | <0.001  |
| <b>Length of Stay, day</b>        |       |       |       |       |       |       |       |        |        |       |        |         |
| All Discharges <sup>#</sup>       | 12.0  | 11.7  | 12.5  | 11.8  | 11.5  | 11.4  | 11.1  | 10.8   | 10.5   | 10.4  | 9.8    | <0.001  |
| <b>Age Group, year</b>            |       |       |       |       |       |       |       |        |        |       |        |         |
| 18–35                             | 11.4  | 10.1  | 12.2  | 10.6  | 10.2  | 10.2  | 9.3   | 9.1    | 9.5    | 9.6   | 8.6    | 0.003   |
| 36–60                             | 12.2  | 12.4  | 12.7  | 12.3  | 12.2  | 12.1  | 12.0  | 11.6   | 10.9   | 10.7  | 10.3   | <0.001  |
| >61                               | 12.6  | 12.7  | 12.6  | 12.3  | 12.1  | 11.8  | 11.6  | 11.4   | 11.2   | 11.1  | 10.7   | <0.001  |
| <b>Charge per Stay (RMB Yuan)</b> |       |       |       |       |       |       |       |        |        |       |        |         |
| All Discharges <sup>#</sup>       | 5168  | 4677  | 5466  | 5821  | 6647  | 7228  | 7037  | 7953   | 8707   | 9594  | 9772   | <0.001  |
| <b>Age Group, year</b>            |       |       |       |       |       |       |       |        |        |       |        |         |
| 18–35                             | 4886  | 4566  | 5646  | 6647  | 6935  | 7644  | 7480  | 8799   | 9789   | 11660 | 12178  | <0.001  |
| 36–60                             | 5215  | 4478  | 5170  | 4994  | 6062  | 6592  | 6325  | 7171   | 7469   | 8144  | 8253   | <0.001  |
| >61                               | 5523  | 5414  | 5969  | 6681  | 7763  | 8266  | 8235  | 8655   | 10261  | 10043 | 9830   | <0.001  |
| <b>Readmission rate (%)</b>       |       |       |       |       |       |       |       |        |        |       |        |         |
| All Discharges <sup>\$</sup>      | 3.75  | 4.61  | 4.98  | 4.99  | 5.56  | 5.74  | 6.59  | 4.55   | 2.81   | 2.85  | 3.13   | 0.224   |
| <b>Age Group, year</b>            |       |       |       |       |       |       |       |        |        |       |        |         |
| 18–35                             | 0.75  | 1.69  | 3.55  | 0.00  | 0.56  | 2.99  | 1.37  | 2.81   | 1.20   | 0.00  | 1.34   | 0.741   |
| 36–60                             | 3.70  | 4.35  | 7.59  | 7.59  | 9.42  | 11.11 | 11.28 | 7.07   | 1.97   | 2.69  | 2.23   | 0.437   |
| >61                               | 4.01  | 5.02  | 4.74  | 4.78  | 5.00  | 4.77  | 5.86  | 4.16   | 3.18   | 3.04  | 3.50   | 0.090   |

# Age-adjusted estimates; \$ Unadjusted for age

Table S3. Age-adjusted and age-specified discharge rate, length of stay, mean charge per stay and readmission rate for patients with pneumonia aged ≥18 years, in Dalian city, from 2005 to 2015.

| Year                              | 2005  | 2006  | 2007  | 2008  | 2009  | 2010  | 2011  | 2012  | 2013  | 2014  | 2015  | P Trend |
|-----------------------------------|-------|-------|-------|-------|-------|-------|-------|-------|-------|-------|-------|---------|
| <b>Rate per 100,000</b>           |       |       |       |       |       |       |       |       |       |       |       |         |
| All Discharges                    | 112.3 | 102.2 | 116.8 | 140.5 | 170.5 | 175.8 | 171.0 | 182.1 | 213.6 | 215.9 | 215.6 | <0.001  |
| <b>Age Group, y</b>               |       |       |       |       |       |       |       |       |       |       |       |         |
| 18-35                             | 49.4  | 38.5  | 31.7  | 58.8  | 78.2  | 74.0  | 68.0  | 75.6  | 130.7 | 119.7 | 79.5  | 0.004   |
| 36-60                             | 58.1  | 55.8  | 58.9  | 78.3  | 106.3 | 102.6 | 112.0 | 114.4 | 137.0 | 151.0 | 147.7 | <0.001  |
| ≥61                               | 368.8 | 338.8 | 421.3 | 451.3 | 505.1 | 551.4 | 509.3 | 550.6 | 566.4 | 559.3 | 634.7 | <0.001  |
| <b>Length of Stay, d</b>          |       |       |       |       |       |       |       |       |       |       |       |         |
| All Discharges #                  | 12.0  | 12.5  | 12.8  | 12.1  | 11.5  | 11.3  | 11.1  | 11.2  | 11.0  | 10.7  | 10.4  | <0.001  |
| <b>Age Group, y</b>               |       |       |       |       |       |       |       |       |       |       |       |         |
| 18-35                             | 11.0  | 11.8  | 12.0  | 11.2  | 10.4  | 10.8  | 10.4  | 10.5  | 10.5  | 10.0  | 9.8   | 0.001   |
| 36-60                             | 12.5  | 12.6  | 13.0  | 12.3  | 11.6  | 11.3  | 11.0  | 11.2  | 11.0  | 10.7  | 10.4  | <0.001  |
| ≥61                               | 12.6  | 13.5  | 13.7  | 13.3  | 13.3  | 12.4  | 12.5  | 12.3  | 11.9  | 11.8  | 11.4  | 0.001   |
| <b>Charge per Stay (RMB yuan)</b> |       |       |       |       |       |       |       |       |       |       |       |         |
| All Discharges #                  | 4596  | 4987  | 5948  | 6253  | 7104  | 7100  | 7162  | 7880  | 8003  | 8695  | 9296  | <0.001  |
| <b>Age Group, y</b>               |       |       |       |       |       |       |       |       |       |       |       |         |
| 18-35                             | 3601  | 3651  | 4173  | 4576  | 5236  | 5596  | 5490  | 5873  | 6115  | 6215  | 6761  | <0.001  |
| 36-60                             | 4588  | 4772  | 6031  | 6025  | 6743  | 6518  | 6781  | 7392  | 7365  | 8189  | 8737  | <0.001  |
| ≥61                               | 6320  | 7865  | 8759  | 9747  | 11293 | 11274 | 11072 | 12652 | 12986 | 14326 | 15167 | <0.001  |
| <b>Readmission rate (%)</b>       |       |       |       |       |       |       |       |       |       |       |       |         |
| All Discharges §                  | 1.81  | 1.60  | 1.99  | 2.00  | 1.68  | 1.55  | 1.71  | 1.83  | 1.39  | 1.52  | 1.47  | 0.044   |
| <b>Age Group, y</b>               |       |       |       |       |       |       |       |       |       |       |       |         |
| 18-35                             | 0.51  | 0.00  | 0.20  | 0.00  | 0.32  | 0.72  | 0.09  | 0.23  | 0.27  | 0.21  | 0.64  | 0.46    |
| 36-60                             | 1.01  | 0.83  | 1.75  | 1.78  | 0.56  | 0.63  | 0.54  | 0.59  | 0.44  | 0.67  | 0.42  | 0.04    |
| ≥61                               | 2.52  | 2.30  | 2.35  | 2.58  | 2.68  | 2.18  | 2.67  | 2.74  | 2.22  | 2.32  | 2.06  | 0.36    |

# Age-adjusted estimates; § Unadjusted for age

Table S4. Age-adjusted and age-specified discharge rate, length of stay, mean charge per stay and readmission rate for patients with asthma aged  $\geq 18$  years, in Dalian city, from 2005 to 2015.

| Year                              | 2005  | 2006 | 2007 | 2008 | 2009 | 2010 | 2011  | 2012  | 2013  | 2014  | 2015  | P Trend |
|-----------------------------------|-------|------|------|------|------|------|-------|-------|-------|-------|-------|---------|
| <b>Rate per 100,000</b>           |       |      |      |      |      |      |       |       |       |       |       |         |
| All Discharges <sup>#</sup>       | 21.8  | 22.2 | 27.6 | 29.2 | 30.8 | 30.1 | 33.3  | 34.8  | 35.2  | 39.6  | 39.7  | <0.001  |
| <b>Age Group, y</b>               |       |      |      |      |      |      |       |       |       |       |       |         |
| 18-35                             | 6.5   | 6.6  | 7.1  | 8.1  | 7.3  | 5.6  | 7.7   | 8.3   | 8.0   | 9.8   | 11.0  | <0.001  |
| 36-60                             | 24.1  | 24.8 | 30.5 | 31.7 | 35.1 | 36.7 | 39.6  | 42.9  | 43.0  | 47.5  | 47.8  | <0.001  |
| $\geq 61$                         | 41.4  | 41.7 | 54.4 | 58.4 | 59.3 | 53.9 | 59.5  | 57.8  | 60.2  | 68.7  | 66.2  | <0.001  |
| <b>Length of Stay, d</b>          |       |      |      |      |      |      |       |       |       |       |       |         |
| All Discharges <sup>#</sup>       | 12.0  | 11.2 | 11.8 | 11.6 | 11.4 | 11.4 | 10.7  | 10.8  | 11.0  | 10.5  | 10.0  | <0.001  |
| <b>Age Group, y</b>               |       |      |      |      |      |      |       |       |       |       |       |         |
| 18-35                             | 9.4   | 8.6  | 10.2 | 10.2 | 9.2  | 9.2  | 8.4   | 8.6   | 9.5   | 8.8   | 8.5   | 0.15    |
| 36-60                             | 13.1  | 11.9 | 11.9 | 11.8 | 12.0 | 12.1 | 11.2  | 11.3  | 11.3  | 10.8  | 10.4  | <0.001  |
| $\geq 61$                         | 13.5  | 13.5 | 14.0 | 13.4 | 13.3 | 13.2 | 13.1  | 13.3  | 13.0  | 12.5  | 11.2  | 0.004   |
| <b>Charge per Stay (RMB yuan)</b> |       |      |      |      |      |      |       |       |       |       |       |         |
| All Discharges <sup>#</sup>       | 38945 | 3704 | 3862 | 4509 | 5561 | 6020 | 5982  | 6595  | 7412  | 7368  | 7332  | <0.001  |
| <b>Age Group, y</b>               |       |      |      |      |      |      |       |       |       |       |       |         |
| 18-35                             | 2746  | 3140 | 3188 | 3734 | 5025 | 5664 | 5324  | 5809  | 6215  | 6464  | 5914  | <0.001  |
| 36-60                             | 4159  | 3800 | 3914 | 4588 | 5738 | 5912 | 6054  | 6627  | 7157  | 7278  | 7759  | <0.001  |
| $\geq 61$                         | 5133  | 4404 | 4871 | 5619 | 5994 | 6928 | 6907  | 7853  | 10161 | 9162  | 8581  | <0.001  |
| <b>Readmission rate (%)</b>       |       |      |      |      |      |      |       |       |       |       |       |         |
| All Discharges <sup>\$</sup>      | 3.32  | 4.15 | 5.78 | 4.88 | 5.40 | 5.36 | 7.31  | 8.65  | 8.23  | 8.63  | 6.55  | 0.001   |
| <b>Age Group, y</b>               |       |      |      |      |      |      |       |       |       |       |       |         |
| 18-35                             | 5.00  | 2.88 | 5.50 | 3.97 | 2.59 | 1.06 | 0.76  | 1.43  | 0.00  | 1.27  | 0.58  | 0.001   |
| 36-60                             | 3.15  | 3.03 | 3.84 | 3.37 | 3.69 | 4.43 | 5.67  | 5.71  | 6.66  | 6.40  | 5.47  | <0.001  |
| $\geq 61$                         | 3.47  | 6.86 | 9.88 | 7.99 | 9.52 | 8.51 | 12.95 | 17.96 | 14.23 | 15.31 | 10.30 | 0.007   |

# Age-adjusted estimates; \$ Unadjusted for age

Table S5. Age-adjusted and age-specified discharge rate, length of stay, mean charge per stay and readmission rate for patients with lung cancer aged  $\geq 18$  years, in Dalian city, from 2005 to 2015.

| Year                              | 2005  | 2006  | 2007  | 2008  | 2009  | 2010  | 2011  | 2012  | 2013  | 2014  | 2015  | P Trend |
|-----------------------------------|-------|-------|-------|-------|-------|-------|-------|-------|-------|-------|-------|---------|
| <b>Rate per 100,000</b>           |       |       |       |       |       |       |       |       |       |       |       |         |
| All Discharges <sup>#</sup>       | 68.3  | 81.3  | 72.8  | 72.1  | 76.2  | 70.6  | 71.2  | 73.2  | 77.0  | 88.5  | 89.5  | 0.046   |
| <b>Age Group, y</b>               |       |       |       |       |       |       |       |       |       |       |       |         |
| 18-35                             | 1.7   | 2.5   | 2.0   | 2.4   | 2.5   | 1.7   | 1.5   | 1.6   | 2.0   | 3.0   | 2.4   | 0.667   |
| 36-60                             | 39.6  | 52.7  | 44.5  | 46.3  | 53.4  | 47.7  | 50.5  | 54.2  | 58.8  | 68.0  | 74.3  | <0.001  |
| $\geq 61$                         | 261.2 | 294.8 | 271.7 | 262.1 | 265.1 | 251.6 | 247.5 | 248.2 | 255.3 | 290.9 | 280.2 | 0.934   |
| <b>Length of Stay, d</b>          |       |       |       |       |       |       |       |       |       |       |       |         |
| All Discharges <sup>#</sup>       | 16.8  | 15.7  | 17.2  | 16.3  | 15.7  | 15.4  | 14.8  | 13.7  | 13.8  | 13.6  | 12.6  | <0.001  |
| <b>Age Group, y</b>               |       |       |       |       |       |       |       |       |       |       |       |         |
| 18-35                             | 17.9  | 14.0  | 16.3  | 16.3  | 13.0  | 15.3  | 12.5  | 12.2  | 13.7  | 12.9  | 10.4  | 0.003   |
| 36-60                             | 16.2  | 16.5  | 18.0  | 16.3  | 17.1  | 15.4  | 16.2  | 14.4  | 13.8  | 14.0  | 13.6  | 0.001   |
| $\geq 61$                         | 16.3  | 16.5  | 16.8  | 16.1  | 16.7  | 15.8  | 15.1  | 14.4  | 13.8  | 13.8  | 13.5  | <0.001  |
| <b>Charge per Stay (RMB yuan)</b> |       |       |       |       |       |       |       |       |       |       |       |         |
| All Discharges <sup>#</sup>       | 10421 | 8208  | 10666 | 11935 | 13808 | 14251 | 16730 | 21832 | 22370 | 24944 | 31958 | <0.001  |
| <b>Age Group, y</b>               |       |       |       |       |       |       |       |       |       |       |       |         |
| 18-35                             | 10290 | 6560  | 9912  | 11387 | 12097 | 13207 | 16769 | 24553 | 23116 | 23125 | 36544 | <0.001  |
| 36-60                             | 10803 | 9090  | 11522 | 12700 | 15153 | 15211 | 17486 | 21275 | 23561 | 27389 | 31826 | <0.001  |
| $\geq 61$                         | 9597  | 8604  | 9603  | 10771 | 13038 | 13401 | 14586 | 18709 | 17819 | 21338 | 24476 | <0.001  |
| <b>Readmission rate (%)</b>       |       |       |       |       |       |       |       |       |       |       |       |         |
| All Discharges <sup>\$</sup>      | 4.11  | 5.21  | 3.68  | 4.25  | 2.66  | 3.64  | 2.86  | 3.36  | 3.30  | 3.524 | 2.98  | 0.038   |
| <b>Age Group, y</b>               |       |       |       |       |       |       |       |       |       |       |       |         |
| 18-35                             | 0.00  | 2.50  | 3.13  | 0.00  | 0.00  | 0.00  | 0.00  | 0.00  | 3.13  | 2.08  | 0.00  | 0.916   |
| 36-60                             | 2.41  | 3.78  | 2.87  | 2.54  | 2.18  | 2.47  | 1.56  | 2.54  | 2.21  | 3.11  | 2.25  | 0.337   |
| $\geq 61$                         | 5.15  | 6.39  | 4.25  | 5.41  | 3.06  | 4.44  | 3.65  | 3.96  | 3.99  | 3.92  | 3.51  | 0.026   |

# Age-adjusted estimates; \$ Unadjusted for age

Table S6. Number of hospitalizations, mean length of stay, mean charge per stay and readmission rate for patients with COPD aged  $\geq 18$  years by the severity of comorbidity, in Dalian city, from 2005 to 2015.

| Year                              | 2005 | 2006 | 2007 | 2008 | 2009 | 2010  | 2011 | 2012  | 2013  | 2014  | 2015  | P Trend |
|-----------------------------------|------|------|------|------|------|-------|------|-------|-------|-------|-------|---------|
| <b>Number of hospitalizations</b> |      |      |      |      |      |       |      |       |       |       |       |         |
| Severity of comorbidity           |      |      |      |      |      |       |      |       |       |       |       |         |
| without comorbidity               | 5144 | 4400 | 6049 | 6476 | 7355 | 8897  | 9154 | 10694 | 11240 | 9722  | 11111 | <0.001  |
| mild comorbidities                | 2008 | 2044 | 2659 | 2887 | 3375 | 4553  | 4705 | 5995  | 6499  | 6628  | 7797  | <0.001  |
| serious comorbidities             | 490  | 577  | 651  | 699  | 933  | 1059  | 1147 | 1417  | 1485  | 2303  | 2057  | <0.001  |
| <b>Length of Stay, d</b>          |      |      |      |      |      |       |      |       |       |       |       |         |
| Severity of comorbidity           |      |      |      |      |      |       |      |       |       |       |       |         |
| without comorbidity               | 12.0 | 12.3 | 12.2 | 11.9 | 11.8 | 11.8  | 11.5 | 11.3  | 10.9  | 10.8  | 10.3  | <0.001  |
| mild comorbidities                | 13.4 | 12.9 | 12.9 | 12.7 | 12.5 | 11.8  | 11.8 | 11.4  | 11.3  | 11.1  | 10.7  | <0.001  |
| serious comorbidities             | 14.1 | 13.8 | 14.9 | 13.9 | 13.0 | 13.0  | 12.3 | 12.5  | 12.4  | 11.9  | 11.3  | <0.001  |
| <b>Charge per Stay (RMB Yuan)</b> |      |      |      |      |      |       |      |       |       |       |       |         |
| Severity of comorbidity           |      |      |      |      |      |       |      |       |       |       |       |         |
| without comorbidity               | 4875 | 4893 | 5256 | 5741 | 6566 | 7243  | 7153 | 7779  | 8228  | 8713  | 9086  | <0.001  |
| mild comorbidities                | 6482 | 5697 | 6397 | 7137 | 8506 | 8444  | 8462 | 8636  | 8742  | 9994  | 9590  | <0.001  |
| serious comorbidities             | 7033 | 5696 | 8181 | 8148 | 9145 | 10396 | 9340 | 10744 | 10783 | 12328 | 11252 | <0.001  |
| <b>Readmission rate (%)</b>       |      |      |      |      |      |       |      |       |       |       |       |         |
| Severity of comorbidity           |      |      |      |      |      |       |      |       |       |       |       |         |
| without comorbidity               | 3.88 | 4.41 | 5.71 | 5.51 | 6.41 | 7.36  | 8.02 | 5.07  | 2.52  | 2.70  | 2.59  | 0.291   |
| mild comorbidities                | 3.99 | 5.96 | 4.07 | 4.56 | 4.30 | 4.07  | 5.26 | 4.44  | 3.24  | 2.90  | 3.37  | 0.059   |
| serious comorbidities             | 3.59 | 4.15 | 5.68 | 5.75 | 7.61 | 4.44  | 6.90 | 3.81  | 4.21  | 3.97  | 6.25  | 0.819   |

Table S7. Number of hospitalizations, mean length of stay, mean charge per stay and readmission rate for patients with pneumonia aged  $\geq 18$  years by the severity of comorbidity, in Dalian city, from 2005 to 2015.

| Year                              | 2005 | 2006  | 2007  | 2008  | 2009  | 2010  | 2011  | 2012  | 2013  | 2014  | 2015  | P Trend |
|-----------------------------------|------|-------|-------|-------|-------|-------|-------|-------|-------|-------|-------|---------|
| <b>Number of hospitalizations</b> |      |       |       |       |       |       |       |       |       |       |       |         |
| Severity of comorbidity           |      |       |       |       |       |       |       |       |       |       |       |         |
| without comorbidity               | 3540 | 3142  | 3470  | 4524  | 5619  | 6151  | 6150  | 6676  | 8250  | 8158  | 7961  | <0.001  |
| mild comorbidities                | 1492 | 1528  | 1862  | 2185  | 2751  | 3276  | 3215  | 3766  | 4243  | 4642  | 5352  | <0.001  |
| serious comorbidities             | 735  | 704   | 965   | 1057  | 1185  | 1521  | 1611  | 1758  | 1942  | 2163  | 2444  | <0.001  |
| <b>Length of Stay, d</b>          |      |       |       |       |       |       |       |       |       |       |       |         |
| Severity of comorbidity           |      |       |       |       |       |       |       |       |       |       |       |         |
| without comorbidity               | 11.9 | 12.5  | 12.7  | 11.9  | 11.7  | 11.3  | 11.2  | 11.2  | 11.1  | 10.8  | 10.6  | <0.001  |
| mild comorbidities                | 12.9 | 13.3  | 13.8  | 13.9  | 13.1  | 12.5  | 12.5  | 12.4  | 11.9  | 11.6  | 11.2  | <0.001  |
| serious comorbidities             | 13.5 | 14.6  | 14.7  | 14.0  | 14.2  | 13.2  | 13.0  | 12.4  | 12.0  | 12.1  | 11.6  | <0.001  |
| <b>Charge per Stay (RMB Yuan)</b> |      |       |       |       |       |       |       |       |       |       |       |         |
| Severity of comorbidity           |      |       |       |       |       |       |       |       |       |       |       |         |
| without comorbidity               | 4467 | 5294  | 6276  | 6198  | 7366  | 7232  | 7403  | 8724  | 8515  | 9592  | 11131 | <0.001  |
| mild comorbidities                | 6562 | 7091  | 8429  | 9916  | 10850 | 10646 | 10856 | 12174 | 11979 | 12592 | 13442 | <0.001  |
| serious comorbidities             | 7884 | 10329 | 10941 | 12035 | 12741 | 14183 | 12393 | 12888 | 13974 | 15191 | 15836 | <0.001  |
| <b>Readmission rate (%)</b>       |      |       |       |       |       |       |       |       |       |       |       |         |
| Severity of comorbidity           |      |       |       |       |       |       |       |       |       |       |       |         |
| without comorbidity               | 1.37 | 1.00  | 1.61  | 1.69  | 1.04  | 1.00  | 0.99  | 1.40  | 0.98  | 0.85  | 0.89  | 0.073   |
| mild comorbidities                | 2.40 | 2.62  | 2.48  | 2.15  | 2.96  | 2.31  | 2.29  | 2.09  | 1.46  | 2.04  | 1.75  | 0.018   |
| serious comorbidities             | 2.94 | 2.33  | 2.66  | 3.32  | 2.07  | 2.36  | 3.60  | 3.17  | 3.19  | 3.10  | 2.91  | 0.266   |

Table S8. Number of hospitalizations, mean length of stay, mean charge per stay and readmission rate for patients with asthma aged  $\geq 18$  years by the severity of comorbidity, in Dalian city, from 2005 to 2015.

| Year                              | 2005 | 2006 | 2007 | 2008 | 2009 | 2010 | 2011  | 2012  | 2013  | 2014  | 2015 | P Trend |
|-----------------------------------|------|------|------|------|------|------|-------|-------|-------|-------|------|---------|
| <b>Number of hospitalizations</b> |      |      |      |      |      |      |       |       |       |       |      |         |
| <b>Severity of comorbidity</b>    |      |      |      |      |      |      |       |       |       |       |      |         |
| without comorbidity               | 924  | 942  | 1173 | 1264 | 1250 | 1395 | 1569  | 1641  | 1674  | 1834  | 1842 | <0.001  |
| mild comorbidities                | 171  | 183  | 244  | 290  | 391  | 375  | 412   | 464   | 518   | 662   | 648  | <0.001  |
| serious comorbidities             | 20   | 33   | 54   | 43   | 66   | 59   | 84    | 102   | 91    | 124   | 150  | <0.001  |
| <b>Length of Stay, d</b>          |      |      |      |      |      |      |       |       |       |       |      |         |
| <b>Severity of comorbidity</b>    |      |      |      |      |      |      |       |       |       |       |      |         |
| without comorbidity               | 12.7 | 11.8 | 12.3 | 12.2 | 12.1 | 12.4 | 11.6  | 11.8  | 11.9  | 11.3  | 10.6 | 0.004   |
| mild comorbidities                | 14.0 | 14.4 | 13.3 | 12.4 | 12.7 | 11.9 | 11.6  | 11.4  | 11.6  | 11.2  | 10.4 | <0.001  |
| serious comorbidities             | 13.0 | 12.4 | 14.5 | 12.9 | 14.1 | 13.9 | 13.9  | 13.5  | 11.3  | 12.0  | 10.8 | 0.091   |
| <b>Charge per Stay (RMB Yuan)</b> |      |      |      |      |      |      |       |       |       |       |      |         |
| <b>Severity of comorbidity</b>    |      |      |      |      |      |      |       |       |       |       |      |         |
| without comorbidity               | 4064 | 3659 | 3987 | 4710 | 5409 | 5950 | 5919  | 6260  | 7974  | 7325  | 7565 | <0.001  |
| mild comorbidities                | 5436 | 4884 | 4578 | 5336 | 6428 | 6785 | 7300  | 8673  | 8667  | 8694  | 8608 | <0.001  |
| serious comorbidities             | 7240 | 5357 | 6299 | 6287 | 7691 | 7738 | 8087  | 10081 | 9186  | 13076 | 9483 | 0.002   |
| <b>Readmission rate (%)</b>       |      |      |      |      |      |      |       |       |       |       |      |         |
| <b>Severity of comorbidity</b>    |      |      |      |      |      |      |       |       |       |       |      |         |
| without comorbidity               | 3.01 | 4.43 | 6.25 | 5.25 | 6.11 | 6.73 | 8.88  | 11.10 | 10.79 | 11.29 | 7.85 | <0.001  |
| mild comorbidities                | 5.56 | 3.98 | 6.55 | 5.07 | 4.27 | 2.74 | 3.78  | 4.98  | 5.07  | 5.58  | 4.52 | 0.739   |
| serious comorbidities             | 5.26 | 3.13 | 1.89 | 2.38 | 6.45 | 0.00 | 10.53 | 5.15  | 0.00  | 4.20  | 7.91 | 0.558   |



Table S9. Number of hospitalizations, mean length of stay, mean charge per stay and readmission rate for patients with lung cancer aged  $\geq 18$  years by the severity of comorbidity, in Dalian city, from 2005 to 2015.

| Year                              | 2005  | 2006  | 2007  | 2008  | 2009  | 2010  | 2011  | 2012  | 2013  | 2014  | 2015  | P Trend |
|-----------------------------------|-------|-------|-------|-------|-------|-------|-------|-------|-------|-------|-------|---------|
| <b>Number of hospitalizations</b> |       |       |       |       |       |       |       |       |       |       |       |         |
| Severity of comorbidity           |       |       |       |       |       |       |       |       |       |       |       |         |
| without comorbidity               | 1948  | 2334  | 1940  | 2020  | 2169  | 2273  | 2511  | 2463  | 2591  | 2878  | 3154  | <0.001  |
| mild comorbidities                | 432   | 470   | 493   | 508   | 590   | 605   | 657   | 659   | 725   | 993   | 1026  | <0.001  |
| serious comorbidities             | 1120  | 1473  | 1503  | 1492  | 1567  | 1595  | 1511  | 1902  | 2146  | 2632  | 2529  | <0.001  |
| <b>Length of Stay, d</b>          |       |       |       |       |       |       |       |       |       |       |       |         |
| Severity of comorbidity           |       |       |       |       |       |       |       |       |       |       |       |         |
| without comorbidity               | 16.2  | 16.2  | 17.1  | 15.7  | 16.1  | 15.2  | 15.6  | 13.8  | 13.9  | 13.9  | 13.4  | <0.001  |
| mild comorbidities                | 16.5  | 16.7  | 17.1  | 17.3  | 16.8  | 16.4  | 15.5  | 15.8  | 14.4  | 14.1  | 14.3  | <0.001  |
| serious comorbidities             | 16.5  | 16.8  | 17.3  | 16.5  | 17.7  | 16.1  | 15.0  | 14.6  | 13.6  | 13.7  | 13.4  | <0.001  |
| <b>Charge per Stay (RMB Yuan)</b> |       |       |       |       |       |       |       |       |       |       |       |         |
| Severity of comorbidity           |       |       |       |       |       |       |       |       |       |       |       |         |
| without comorbidity               | 10421 | 8897  | 10545 | 12196 | 14716 | 15058 | 17642 | 22963 | 24175 | 29193 | 34871 | <0.001  |
| mild comorbidities                | 10130 | 8999  | 10845 | 12398 | 14127 | 14867 | 15836 | 23401 | 22157 | 27106 | 27847 | <0.001  |
| serious comorbidities             | 8448  | 7985  | 9044  | 9377  | 11599 | 11294 | 11003 | 13089 | 12709 | 14611 | 15679 | <0.001  |
| <b>Readmission rate (%)</b>       |       |       |       |       |       |       |       |       |       |       |       |         |
| Severity of comorbidity           |       |       |       |       |       |       |       |       |       |       |       |         |
| without comorbidity               | 4.79  | 8.76  | 4.08  | 4.50  | 2.41  | 2.80  | 2.53  | 2.80  | 2.41  | 2.02  | 1.74  | 0.007   |
| mild comorbidities                | 4.35  | 9.56  | 4.01  | 4.96  | 3.69  | 6.89  | 3.14  | 4.11  | 3.72  | 3.65  | 3.32  | 0.116   |
| serious comorbidities             | 3.42  | 11.00 | 3.44  | 4.19  | 2.82  | 4.04  | 3.56  | 4.16  | 4.53  | 5.49  | 4.68  | 0.638   |
